# Supplementary material for: The Impact of Economic, Energy, and Environmental Factors on the Development of the Hydrogen Economy
Source: MDPI journal article supplement (doi:10.3390/en14164811), 2021-08-07

Figure S1 Matrix for China part1

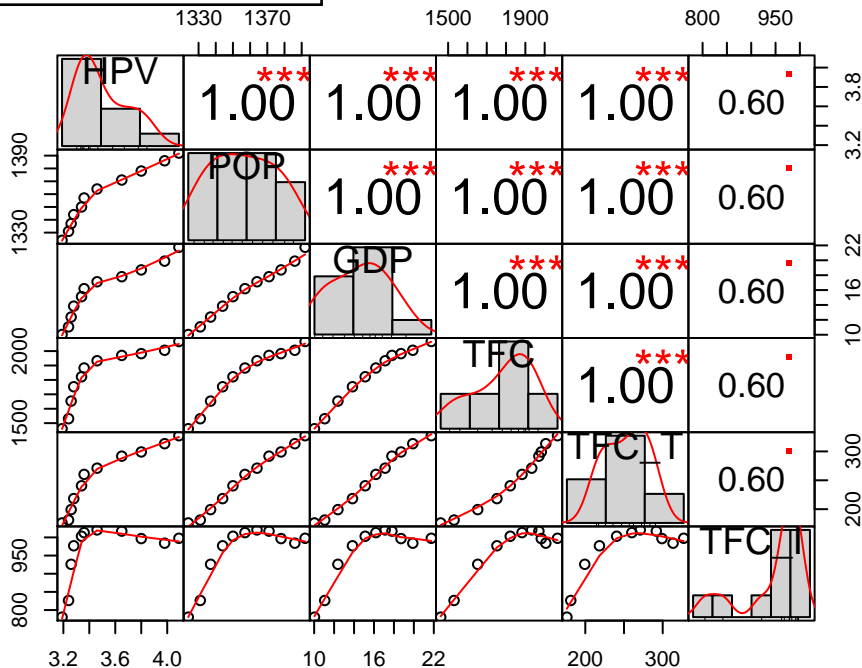

Figure S2 Matrix for China part2

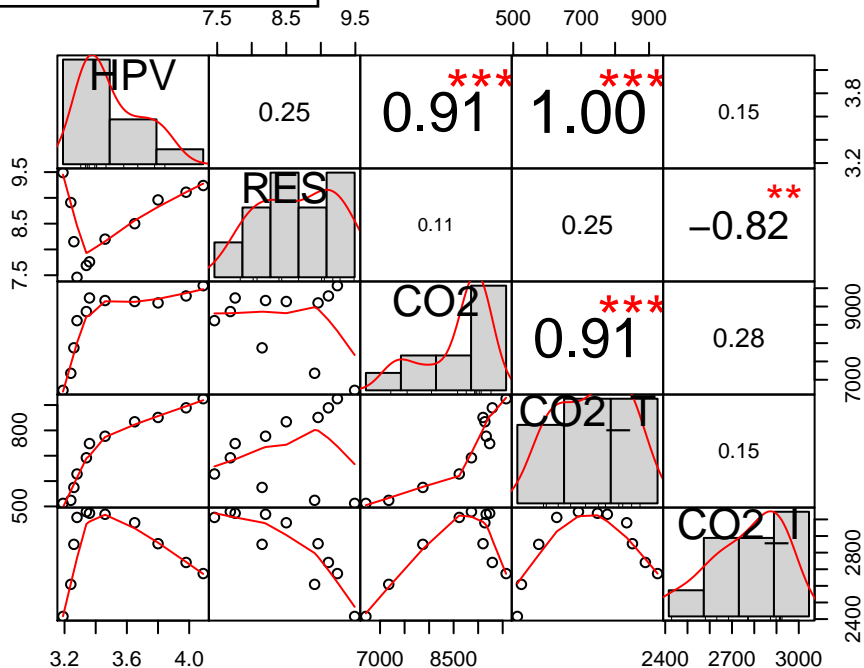



Figure S4 Matrix for South Korea part 2

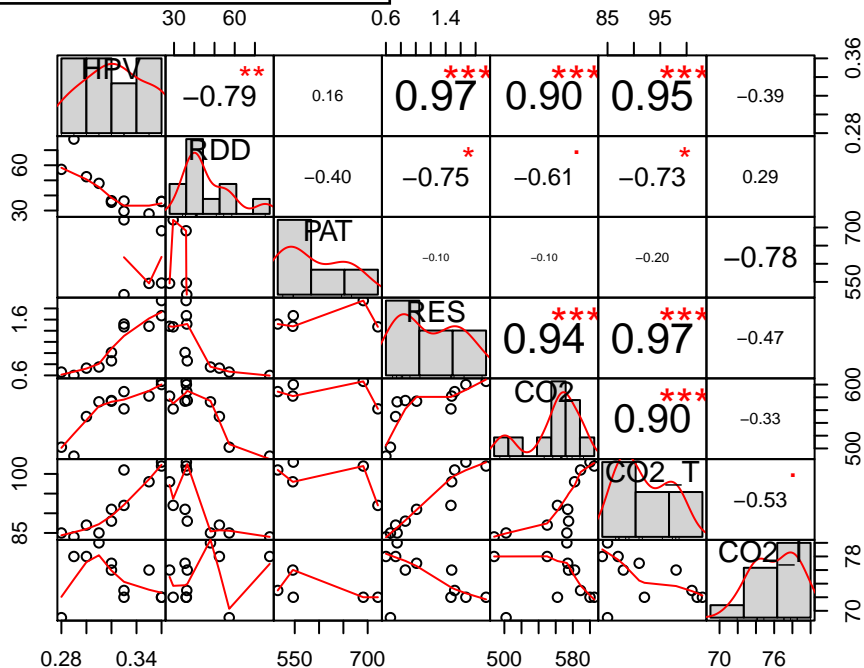

Figure S5 Matrix for the United Kingdom part1

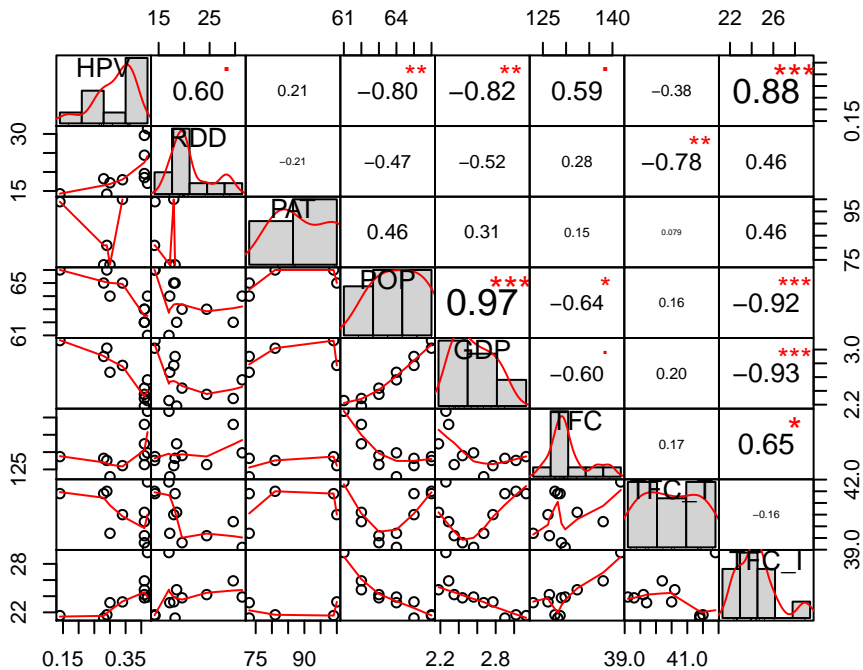

Figure S6 Matrix for the United Kingdom part 2

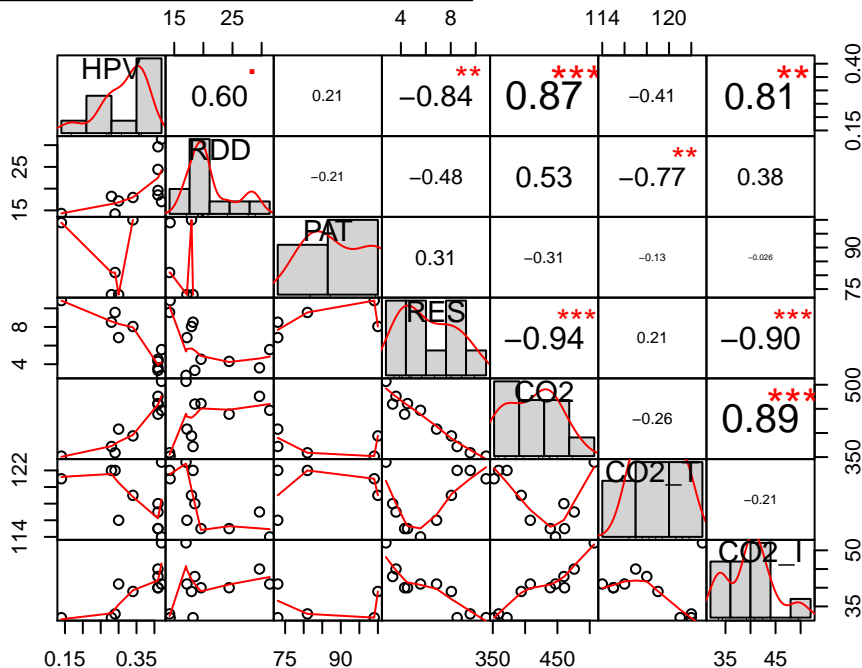

Figure S7 Matrix for Germany part 1

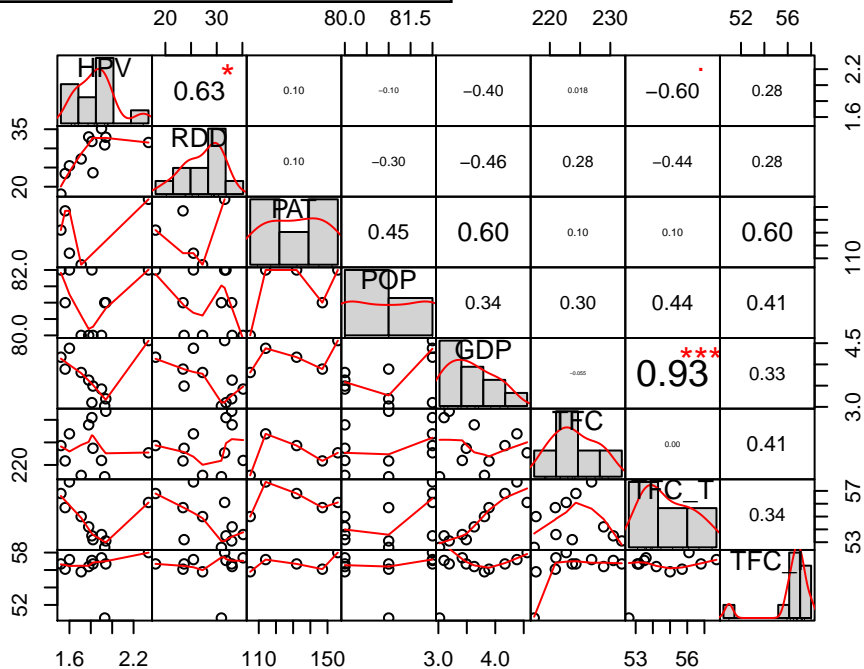

Figure S8 Matrix for Germany part 2

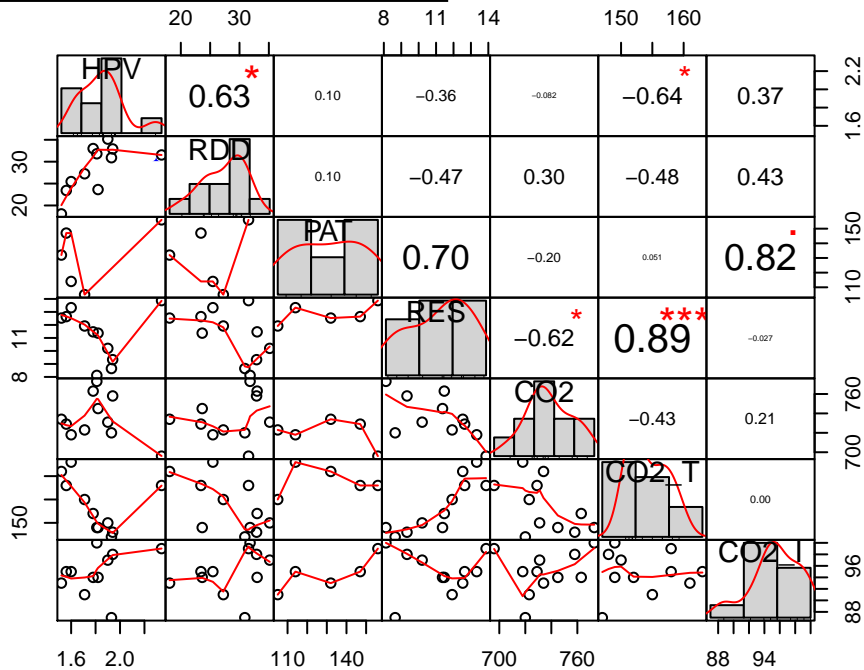



Figure S9 Matrix for France part 1

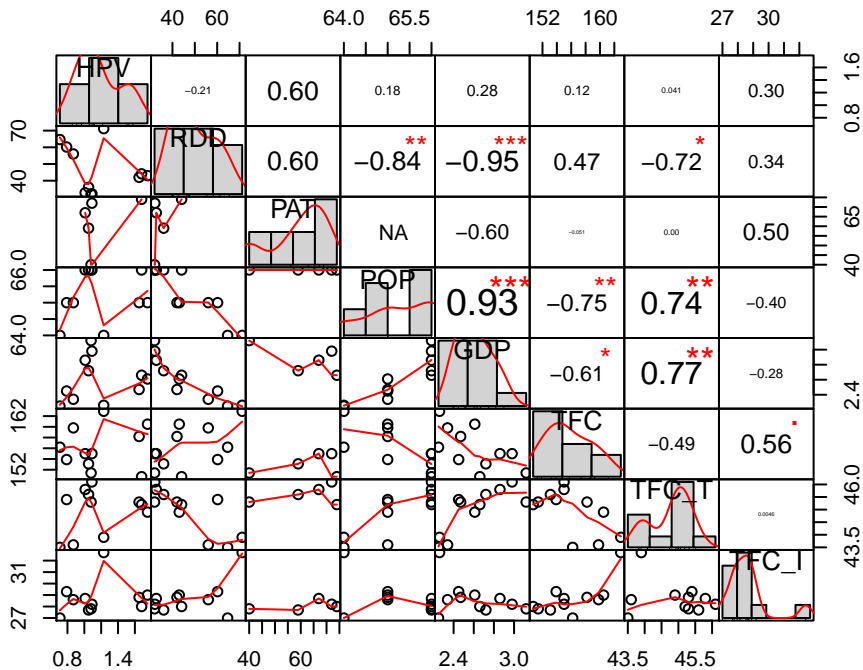

Figure S10 Matrix for France part 2

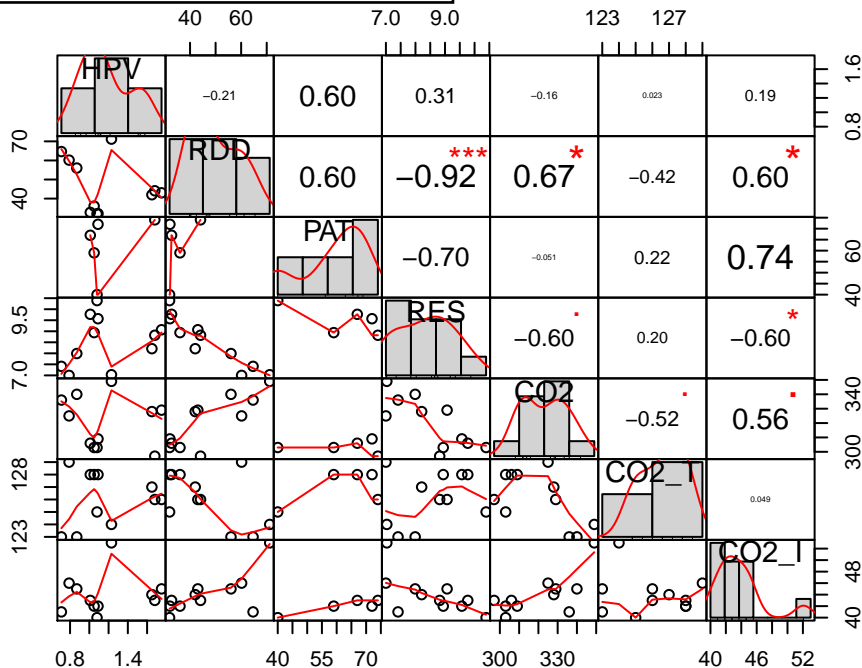

Figure S11 Matrix for Japan part 1

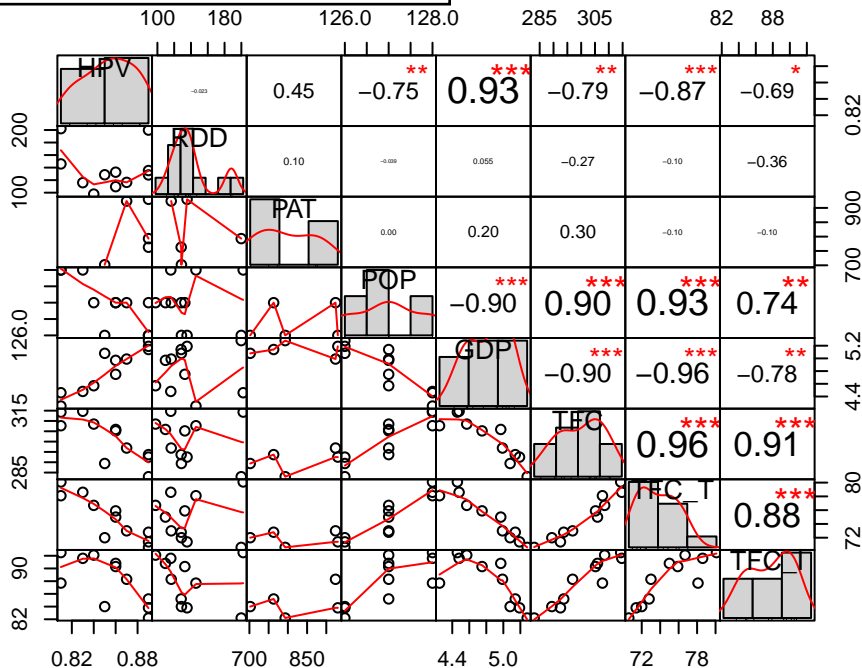

Figure S12 Matrix for Japan part 2

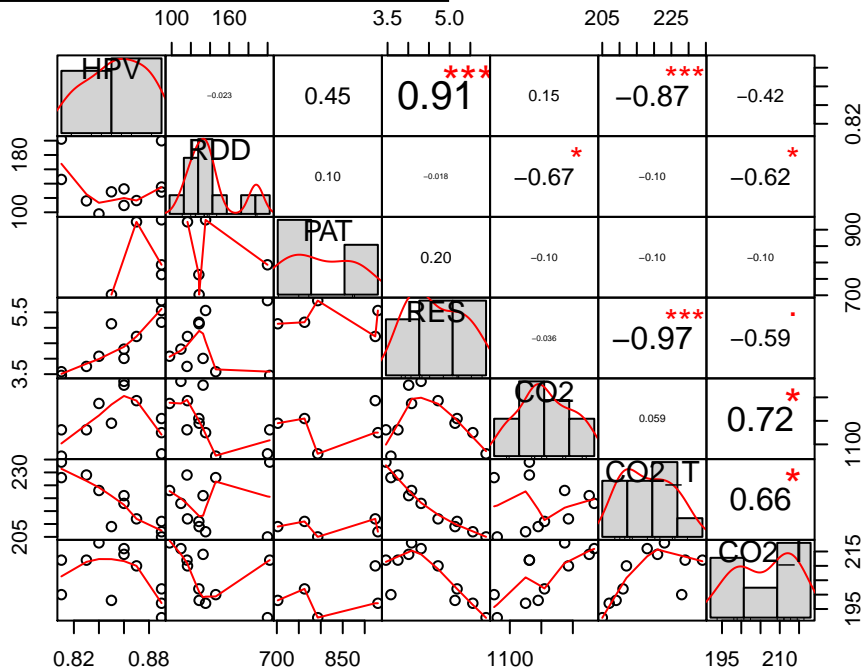

Figure S13 Matrix for the USA part 1

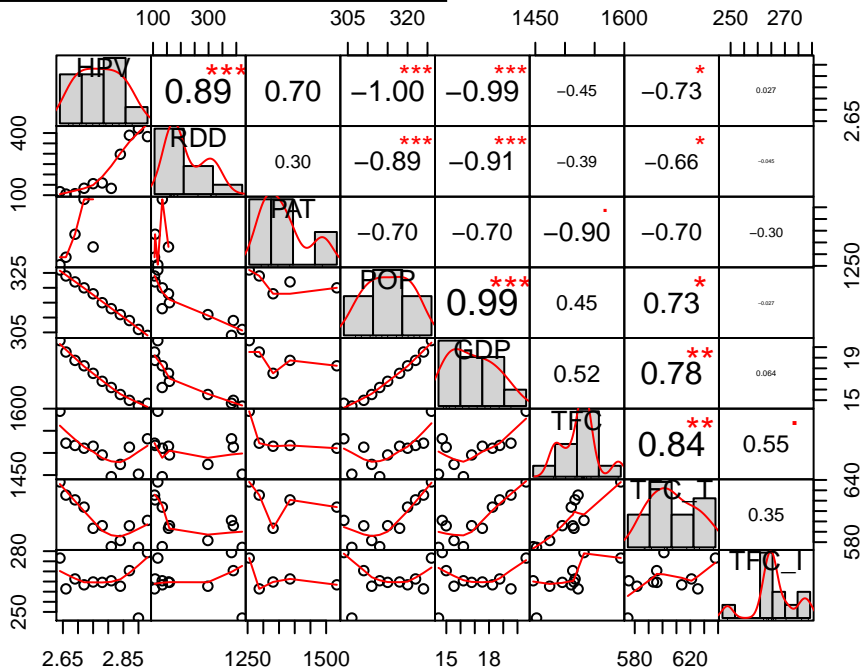

Figure S14 Matrix for the USA part 2

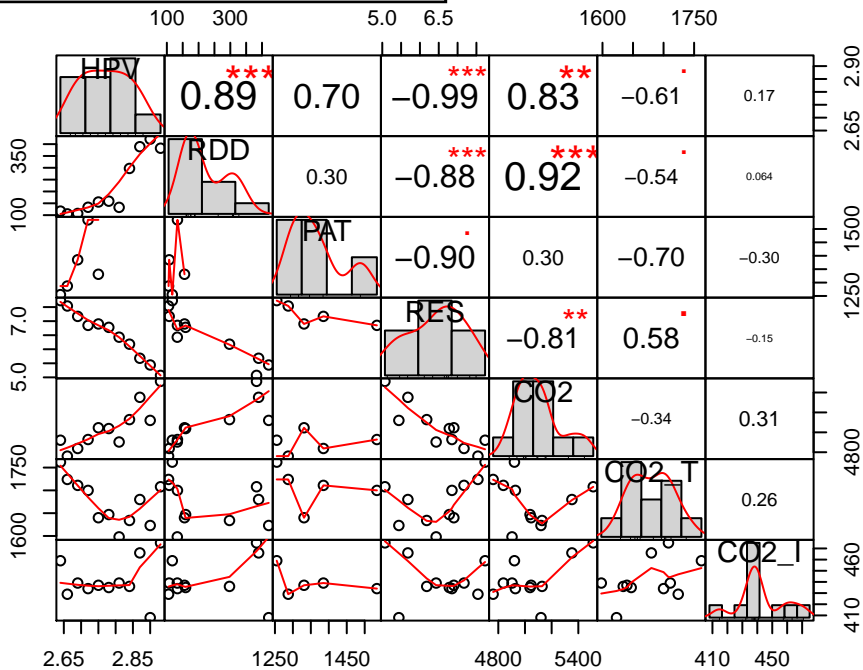

Figure S15 Matrix for the Netherlands part 1

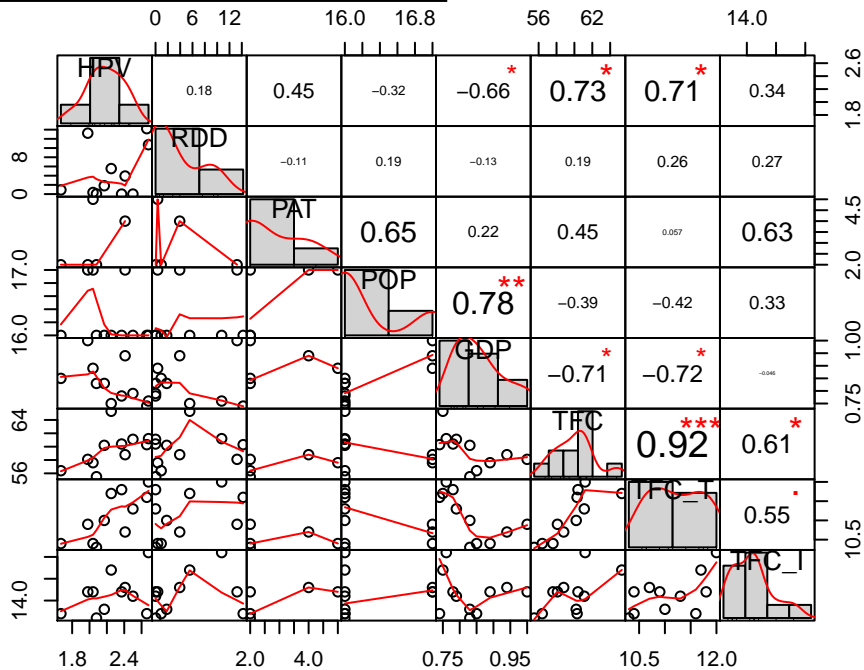

Figure S16 Matrix for the Netherlands part 2

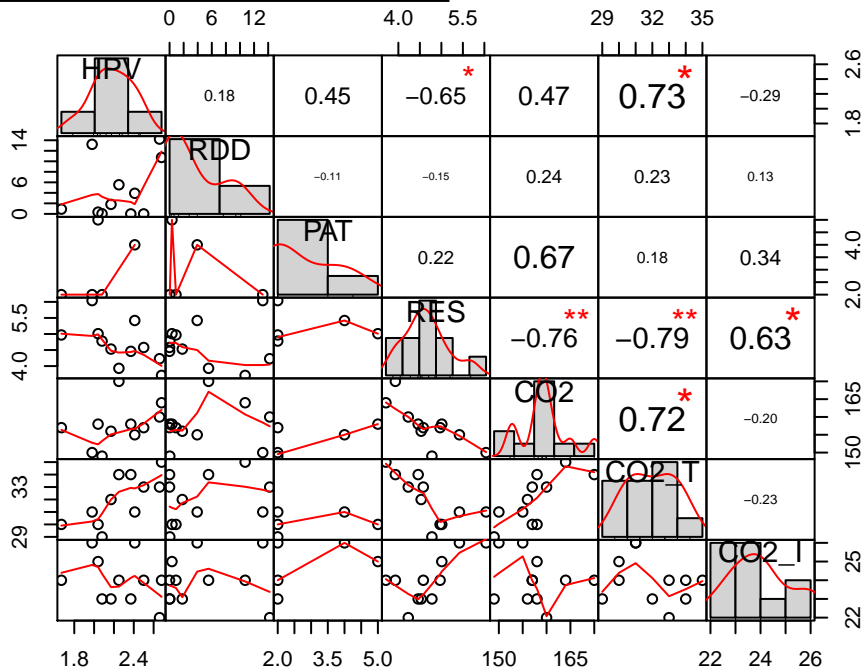



Figure S17 Matrix for Australia part 1

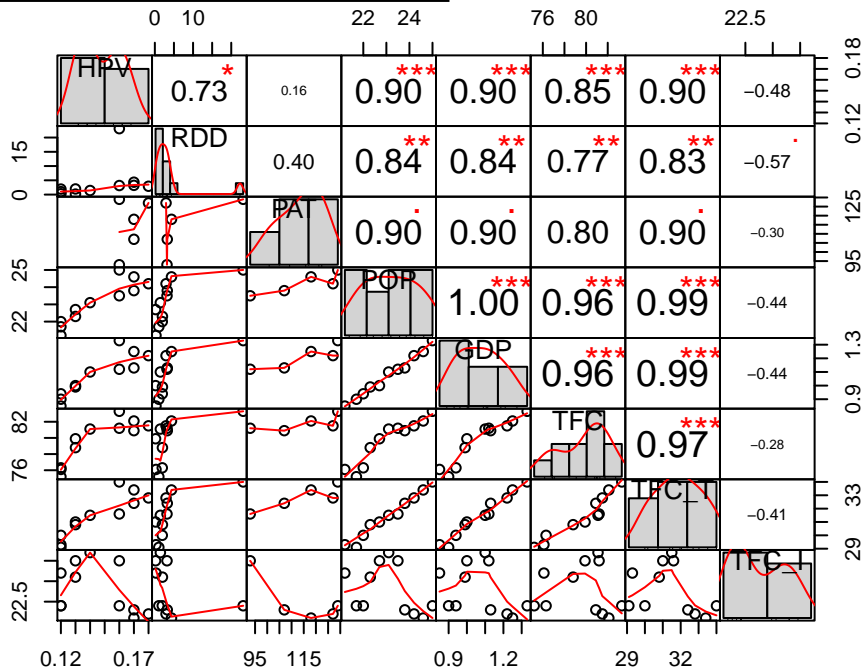

Figure S18 Matrix for Australia part 2

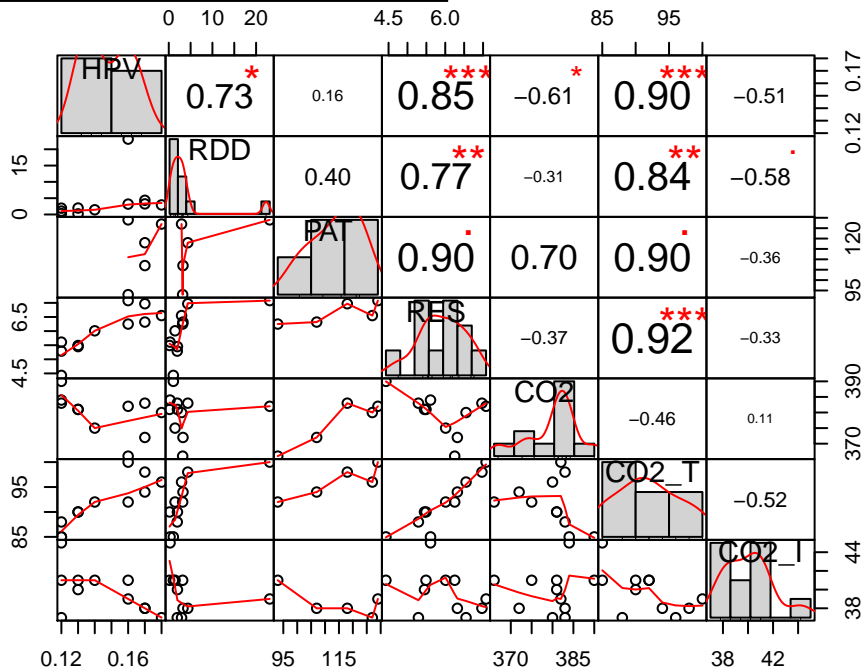

Supplement: s1 [file s1]
